# Supplementary material for: Ecosystem Carbon Storage in Alpine Grassland on the Qinghai Plateau
Source: PubMed Central journal article supplement (PMC4975487; doi:10.1371/journal.pone.0160420), 2016-08-05
Supplement: pone.0160420.s001.pdf [file pone.0160420.s001.pdf]

|    | type   | logitude | latitude | altitude | agb  | agbc     | bgb      | bgbc     |          |
|----|--------|----------|----------|----------|------|----------|----------|----------|----------|
| 1  | alpine | st       | 100.0911 | 34.02083 | 4252 | 61.6425  | 14.80645 | 1916.018 | 549.5883 |
| 2  | alpine | st       | 99.80972 | 33.92222 | 4189 | 64.154   | 20.36147 | 592.1798 | 228.1963 |
| 3  | alpine | st       | 99.81056 | 33.92389 | 4203 | 18.145   | 5.500002 | 140.6582 | 61.25759 |
| 4  | alpine | st       | 99.70278 | 33.80167 | 3956 | 76.2525  | 28.12427 | 2361.111 | 938.1719 |
| 5  | alpine | st       | 99.70444 | 33.80722 | 3974 | 88.914   | 20.26088 | 635.6599 | 241.0817 |
| 6  | alpine | st       | 98.6325  | 35.0325  | 4382 | 39.1425  | 14.00172 | 171.4437 | 64.94111 |
| 7  | alpine | st       | 98.69472 | 37.53139 | 3642 | 191.688  | 80.58609 | 2521.6   | 894.9031 |
| 8  | alpine | st       | 99.22282 | 35.3546  | 4170 | 87.6384  |          | 1103.946 | 358.9429 |
| 9  | alpine | st       | 95.49    | 34.09    | 4306 | 113.0172 | 51.38182 | 4725.97  | 1788.305 |
| 10 | alpine | st       | 95.49    | 34.09    | 4306 | 61.4568  | 24.93753 | 1114.137 | 414.2068 |
| 11 | alpine | st       | 94.55    | 34.5     | 4316 | 35.0164  | 12.52085 | 1446.161 | 494.6768 |
| 12 | alpine | st       | 94.54    | 34.5     | 4315 | 35.434   | 9.539544 | 415.782  | 163.402  |
| 13 | alpine | st       | 93.07    | 35.15    | 4622 | 57.1882  | 16.27659 | 528.4206 | 169.4643 |
| 14 | alpine | st       | 93.7     | 35.15    | 4617 | 4.167    | 0.97772  | 89.26781 | 35.54919 |
| 15 | alpine | st       | 92.26    | 34.12    | 4546 | 47.9114  | 17.52086 | 1773.56  | 565.7087 |
| 16 | alpine | st       | 92.26    | 34.12    | 4540 | 5.76725  | 1.596441 | 226.2075 | 77.95959 |
| 17 | alpine | st       | 92.18    | 33.48    | 4603 | 35.714   | 7.873848 | 1649.903 | 652.5985 |
| 18 | alpine | st       | 92.17    | 33.48    | 4604 | 10.92325 | 3.36271  | 422.0011 | 158.2784 |
| 19 | alpine | st       | 99.53732 | 37.06738 | 3233 | 106.6658 | 43.67394 | 1724.232 | 412.0602 |
| 20 | alpine | st       | 99.53957 | 37.0681  | 3246 | 179.9804 | 74.828   | 1640.773 | 420.0582 |
| 21 | alpine | st       | 99.73862 | 36.75422 | 3275 | 111.4466 | 28.63763 | 3356.06  | 1515.702 |
| 22 | alpine | st       | 101.066  | 37.06857 | 3248 | 187.2384 | 82.3052  | 3281.192 | 1901.768 |
| 23 | alpine | st       | 100.1278 | 35.23722 | 3327 | 103.912  | 40.66439 |          |          |
| 24 | alpine | m€       | 101.2756 | 35.29778 | 3580 | 125.538  | 52.77652 |          |          |
| 25 | alpine | m€       | 101.2714 | 35.29222 | 3580 | 102.1656 | 39.53095 |          |          |
| 26 | alpine | m€       | 101.3253 | 35.28306 | 3635 | 82.004   | 26.90654 |          |          |
| 27 | alpine | m€       | 101.4525 | 35.08222 | 3725 | 70.282   | 29.48249 |          |          |
| 28 | alpine | m€       | 100.8519 | 30.29111 | 4401 | 108.504  | 41.0354  | 4529.835 | 1839.538 |
| 29 | alpine | m€       | 99.88912 | 35.77003 | 3528 | 147.548  | 50.88476 | 863.2637 | 268.3951 |
| 30 | alpine | m€       | 100.9192 | 35.71389 | 3370 | 132.0072 | 58.8113  | 3762.752 | 1501.029 |
| 31 | alpine | m€       | 100.2186 | 33.47306 | 4299 | 98.692   | 38.28054 | 953.083  | 369.8251 |
| 32 | alpine | m€       | 100.2164 | 33.39111 | 4288 | 93.562   | 35.77437 | 4624.779 | 1939.697 |
| 33 | alpine | m€       | 99.38972 | 33.57306 | 4077 | 131.6173 | 50.4624  | 1110.253 | 438.3594 |
| 34 | alpine | m€       | 99.91306 | 33.57444 | 4067 | 160.957  | 65.90019 | 4880.166 | 1811.316 |
| 35 | alpine | m€       | 99.90861 | 33.56833 | 4078 | 111.591  | 45.12084 | 7159.015 | 3140.775 |
| 36 | alpine | m€       | 99.44278 | 33.6825  | 4031 | 185.848  | 54.48656 | 176.4862 | 70.1737  |
| 37 | alpine | m€       | 99.44889 | 33.67972 | 4033 | 191.0256 | 58.5932  | 911.2409 | 313.4579 |
| 38 | alpine | m€       | 99.44917 | 33.67917 | 4040 | 175.008  | 63.74821 | 1363.172 | 560.6037 |
| 39 | alpine | m€       | 99.44889 | 33.51444 | 4039 | 196.312  | 85.27906 | 6189.314 | 2714.981 |
| 40 | alpine | m€       | 99.42611 | 33.75583 | 4009 | 98.728   | 33.12384 | 4673.116 | 1811.55  |
| 41 | alpine | m€       | 99.41889 | 33.75167 | 4012 | 182.2361 | 74.0238  | 7349.906 | 3471.695 |
| 42 | alpine | m€       | 99.16806 | 34.30444 | 4219 | 244.7333 | 92.37984 | 6090.101 | 2627.49  |
| 43 | alpine | m€       | 100.5639 | 32.77639 | 4232 | 147.43   | 36.96177 | 1002.831 | 359.811  |
| 44 | alpine | m€       | 100.5647 | 32.77667 | 4207 | 174.596  | 65.61359 | 3329.972 | 1227.487 |
| 45 | alpine | m€       | 100.5617 | 32.77556 | 4257 | 136.96   | 45.5996  | 5939.269 | 2146.872 |
| 46 | alpine | m€       | 100.4975 | 33.39028 | 3912 | 132.664  | 36.41669 | 2755.662 | 925.6467 |
| 47 | alpine | m€       | 100.4935 | 33.38611 | 3900 | 98.4     | 29.212   | 873.7084 | 266.0423 |
| 48 | alpine | m€       | 100.8519 | 33.29111 | 4401 | 98.216   | 35.69443 | 2649.062 | 1081.04  |
| 49 | alpine | m€       | 100.8519 | 33.29194 | 4420 | 43.2     | 10.17898 | 287.3231 | 102.9764 |
| 50 | alpine | m€       | 100.0617 | 33.43083 | 4235 | 103.1333 | 24.10891 | 1445.418 | 350.5641 |
| 51 | alpine | m€       | 100.9092 | 33.33472 | 4111 | 214.7784 | 83.06156 | 3006.104 | 1430.083 |
| 52 | alpine | m€       | 100.3858 | 33.26806 | 4111 | 172.056  | 65.47704 | 5550.425 | 2283.62  |
| 53 | alpine | m€       | 98.9325  | 34.94083 | 4439 | 46.38667 | 7.95564  | 1750.855 | 689.2663 |

|               |          |          |      |          |          |          |          |
|---------------|----------|----------|------|----------|----------|----------|----------|
| 54 alpine me  | 98.9325  | 34.94139 | 4435 | 178.288  | 74.01024 | 4895.317 | 1767.662 |
| 55 alpine me  | 98.01111 | 34.62167 | 4239 | 155.152  | 61.44436 | 3490.357 | 1244.304 |
| 56 alpine me  | 98.01556 | 34.62389 | 4131 | 283.07   | 41.04811 | 1788.995 | 686.5408 |
| 57 alpine me  | 98.1225  | 34.76833 | 4328 | 110.752  | 44.06252 | 2798.759 | 1067.312 |
| 58 alpine me  | 98.07222 | 35.01333 | 4237 | 102.43   | 31.51101 | 6477.353 | 2623.394 |
| 59 alpine me  | 98.28972 | 34.85167 | 4228 | 106.112  | 22.47818 | 462.1373 | 160.9774 |
| 60 alpine me  | 98.29389 | 34.85333 | 4221 | 242.48   | 91.40572 | 5972.075 | 2042.427 |
| 61 alpine me  | 98.69361 | 37.52472 | 3642 | 67.784   | 27.1489  | 5226.911 | 1914.53  |
| 62 alpine me  | 99.54385 | 35.72048 | 3836 | 67.8184  | 19.41271 | 752.2558 | 268.111  |
| 63 alpine me  | 97.985   | 34.5265  | 4330 | 239.8144 | 16.51825 | 4005.149 | 1549.135 |
| 64 alpine me  | 97.16845 | 33.83675 | 4425 | 133.8912 |          | 3637.739 | 1589.714 |
| 65 alpine me  | 97.22207 | 33.87142 | 4482 | 148.5416 |          | 3742.709 | 1463.499 |
| 66 alpine me  | 97.095   | 33.73903 | 4488 | 183.5931 |          | 3257.519 | 1104.5   |
| 67 alpine me  | 97.23602 | 33.35205 | 4411 | 163.1383 |          | 1706.498 | 686.4438 |
| 68 alpine me  | 96.61303 | 32.68267 | 3947 |          |          | 2663.349 | 1003.796 |
| 69 alpine me  | 96.66242 | 32.84703 | 4282 | 130.027  |          | 1514.361 | 591.1233 |
| 70 alpine me  | 96.64122 | 32.89355 | 4347 | 27.18286 |          | 597.5392 | 251.734  |
| 71 alpine me  | 96.53    | 32.51    | 4001 | 143.1048 |          | 2865.955 | 1185.565 |
| 72 alpine me  | 96.18    | 33.18    | 4391 | 68.0256  | 18.68551 | 361.5888 | 126.6096 |
| 73 alpine me  | 96.18    | 33.18    | 4417 | 70.42    | 23.66073 | 3073.838 | 1199.644 |
| 74 alpine me  | 96.02    | 33.34    | 4303 | 111.0144 |          | 3942.793 | 1168.216 |
| 75 alpine me  | 95.42    | 33.49    | 4232 | 142.4552 |          | 5321.464 | 1954.966 |
| 76 alpine me  | 95.48    | 34.06    | 4219 | 79.07    | 29.29678 | 4187.588 | 1565.437 |
| 77 alpine me  | 95.51    | 34.07    | 4219 | 125.1304 |          | 4142.332 | 1233.105 |
| 78 alpine me  | 95.51    | 34.08    | 4432 | 70.8888  | 19.0739  | 2663.452 | 1614.385 |
| 79 alpine me  | 95.51    | 34.08    | 4428 | 150.5496 |          | 873.5005 | 329.9813 |
| 80 alpine me  | 100.0139 | 36.63675 | 3225 | 175.9624 | 76.16633 | 2000.715 | 2277.098 |
| 81 alpine me  | 100.7527 | 37.022   | 3350 | 96.2544  | 40.28707 | 4851.645 | 2533.846 |
| 82 alpine me  | 100.7529 | 37.02277 | 3336 | 85.2704  | 36.10412 | 2074.435 | 844.9369 |
| 83 alpine me  | 100.3786 | 37.90518 | 3686 | 107.0467 | 40.62223 | 5583.296 | 2039.981 |
| 84 alpine me  | 100.3756 | 37.90773 | 3691 | 117.5573 | 36.02901 | 1254.512 | 447.1708 |
| 85 alpine me  | 100.2574 | 38.00585 | 3985 | 20.6842  | 3.827807 | 177.1231 | 55.33597 |
| 86 alpine me  | 99.38465 | 38.59538 | 3436 | 110.464  | 50.03125 | 4130.551 | 1510.524 |
| 87 alpine me  | 99.38408 | 38.59443 | 3428 | 116.9064 | 51.07467 | 5698.13  | 2280.359 |
| 88 alpine me  | 99.53638 | 38.46792 | 3305 | 137.812  | 55.27258 | 6493.336 | 2592.509 |
| 89 alpine me  | 101.1773 | 37.66925 | 3335 | 67.356   | 29.27034 | 4801.486 | 2045.669 |
| 90 alpine me  | 101.2978 | 37.62035 | 3527 | 82.26667 | 34.34117 | 1645.362 | 630.0638 |
| 91 alpine me  | 100.8983 | 37.96528 | 3200 | 331.0816 | 144.2732 | 1794.276 | 604.3959 |
| 92 alpine me  | 101.0489 | 37.87167 | 3189 | 218.7128 | 89.59963 | 1624.027 | 557.0719 |
| 93 alpine me  | 101.3158 | 37.61306 | 3278 | 159.1208 | 62.86868 | 2968.728 | 1101.698 |
| 94 alpine me  | 101.3064 | 37.61    | 3239 | 130.3368 | 51.81223 | 4112.851 | 1675.655 |
| 95 alpine me  | 101.2578 | 37.70222 | 3241 | 129.7216 | 55.7512  | 1724.235 | 630.2663 |
| 96 alpine me  | 101.1822 | 37.68167 | 3204 | 355.3808 | 155.2854 | 2604.462 | 908.3276 |
| 97 alpine me  | 101.7356 | 34.65167 | 3593 | 130.57   | 41.45507 |          |          |
| 98 alpine me  | 101.7489 | 34.66444 | 3596 | 243.6816 | 105.097  |          |          |
| 99 alpine me  | 100.8672 | 34.97417 | 3800 | 109.6128 | 39.06028 |          |          |
| 100 alpine me | 100.8658 | 34.97194 | 3802 | 132.922  | 57.66733 |          |          |
| 101 alpine me | 100.8647 | 34.97028 | 3786 | 75.2016  | 30.06517 |          |          |
| 102 alpine me | 100.5719 | 34.34    | 4084 | 137.8904 | 42.08449 |          |          |
| 103 alpine me | 100.5719 | 34.33972 | 4081 | 71.7512  | 27.33315 |          |          |
| 104 alpine me | 100.4964 | 34.3525  | 3957 | 124.0232 | 45.62918 |          |          |
| 105 alpine me | 100.4925 | 34.36583 | 3955 | 129.5952 | 55.70699 |          |          |
| 106 alpine me | 100.4922 | 34.35806 | 3948 | 239.1752 | 99.40376 |          |          |
| 107 alpine me | 100.2808 | 34.42111 | 3768 | 77.2176  | 29.28586 |          |          |

|               |          |          |      |          |          |
|---------------|----------|----------|------|----------|----------|
| 108 alpine m€ | 100.4058 | 34.47833 | 4328 | 216.0776 | 90.00468 |
| 109 alpine m€ | 100.2728 | 34.39361 | 3820 | 82.556   | 33.92316 |
| 110 alpine m€ | 100.1358 | 34.15056 | 4089 | 140.3347 | 39.54066 |
| 111 alpine m€ | 100.1358 | 34.15528 | 4091 | 131.8056 |          |
| 112 alpine m€ | 100.6094 | 34.32972 | 4151 | 88.5368  | 27.71692 |
| 113 alpine m€ | 100.6075 | 34.32833 | 4145 | 77.032   | 22.43952 |
| 114 alpine m€ | 100.0853 | 34.08194 | 4212 | 98.1736  | 35.29649 |
| 115 alpine m€ | 100.085  | 34.06833 | 4292 | 35.276   | 12.585   |

soc

6. 484001  
7. 178189  
7. 349011  
17. 25103  
10. 19863  
10. 73658  
9. 828773  
4. 536492  
10. 90402  
16. 07289  
11. 04238  
4. 577708  
3. 733823  
1. 909889  
8. 770097  
4. 089461  
7. 276436  
7. 1098  
14. 37356  
12. 76666  
21. 04537  
23. 51554  
20. 25689  
22. 1599  
14. 16764  
15. 00411  
18. 48816  
12. 96189  
15. 67027  
15. 80023  
8. 68362  
13. 16134  
12. 26278  
16. 43247  
16. 43247  
12. 93693  
14. 53498  
17. 60088  
17. 85531  
15. 07702  
17. 41507  
22. 5287  
16. 17762  
23. 11426  
17. 26669  
6. 830641  
19. 52291  
13. 49201  
13. 83998  
16. 30169  
19. 1919  
14. 62349  
21. 97125

19. 17833  
22. 41385  
22. 81697  
22. 84124  
17. 17202  
11. 39485  
16. 11537  
6. 788638  
9. 606937  
18. 34411  
13. 04814  
18. 70695  
23. 47328  
24. 96827  
18. 33443  
24. 77735  
11. 4682  
16. 09545  
14. 79767  
22. 9855  
23. 86127  
10. 57131  
20. 76621  
7. 538972  
22. 82998  
17. 56433  
24. 36943  
18. 45432  
18. 74068  
18. 9304  
20. 89118  
17. 29204  
11. 24947  
20. 05305  
25. 90733  
22. 39212  
22. 38852  
17. 48817  
25. 03215  
22. 32507  
18. 70913  
20. 6661  
19. 20717  
24. 6492  
23. 53618  
21. 27779  
23. 44659  
20. 74843  
20. 68063  
11. 08725  
16. 78577  
18. 79912  
23. 20801  
15. 4747

12. 809  
13. 65386  
8. 926097  
15. 02563  
14. 38211  
18. 93104  
14. 85002  
14. 51011
